# Supplementary material for: Molecular Mechanism of Resistance to Alternaria alternata Apple Pathotype in Apple by Alternative Splicing of Transcription Factor MdMYB6-like
Source: MDPI journal article supplement (doi:10.3390/ijms25084353), 2024-04-15
Supplement: s1 [file s1]

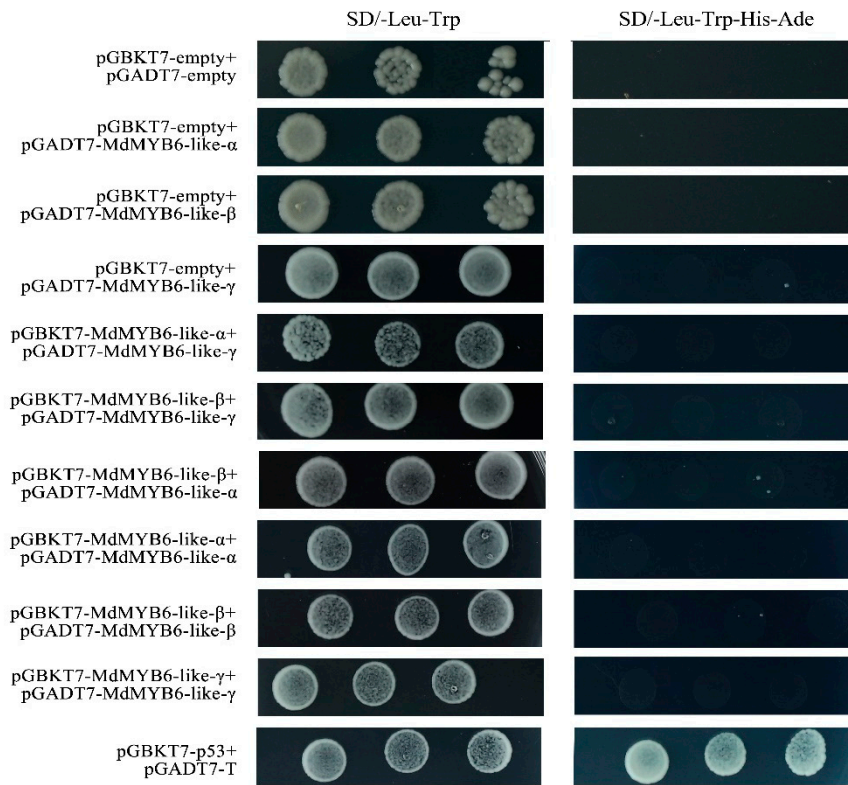

**Figure S3.** Yeast two-hybrid of binding of MdMYB6-like and its alternative spliced variants to form homologous and heterologous complexes. Transformed the constructed plasmid into the AH109 yeast strain in different combinations. Co-transformation of empty pGADT7 and pGBKT7 vector was used as a negative control, and co-transformation of pGBKT7-p53 and pGADT7-T vector was used as a positive control. Three repetitions for each combination.
