# Supplementary material for: Molecular Mechanism of Resistance to Alternaria alternata Apple Pathotype in Apple by Alternative Splicing of Transcription Factor MdMYB6-like
Source: MDPI journal article supplement (doi:10.3390/ijms25084353), 2024-04-15
Supplement: s1 [file s1]

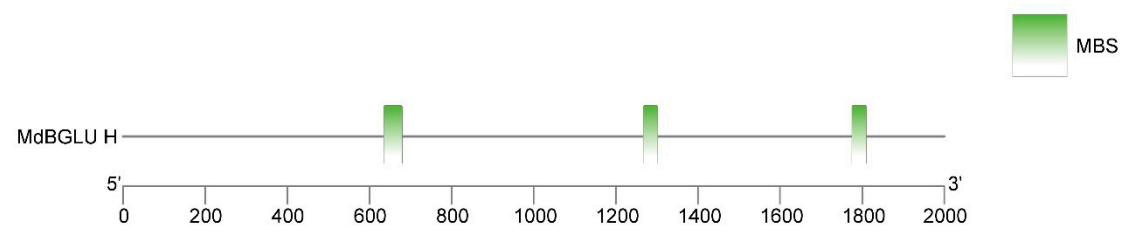

**Figure S5.** Visualization of the promoter of MdBGLU H. The cis-acting element MBS is marked with a green box. The location of the elements on the promoter is shown in the figure.
