# Supplementary material for: Molecular Mechanism of Resistance to Alternaria alternata Apple Pathotype in Apple by Alternative Splicing of Transcription Factor MdMYB6-like
Source: MDPI journal article supplement (doi:10.3390/ijms25084353), 2024-04-15
Supplement: s1 [file s1]

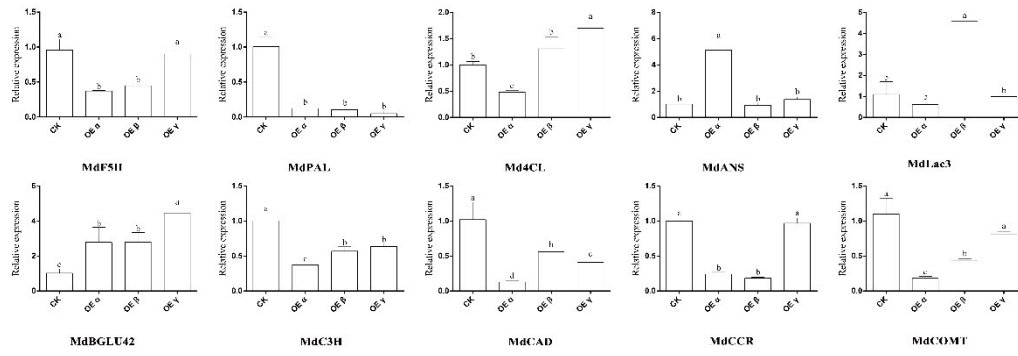

**Figure S4:** Using RT-qPCR analysis to expression level changes of lignin synthesis-related genes after transient overexpression of MdMYB6-like and its alternative spliced variants. The genes involved in the analysis included MdF5H (NCBI Reference Sequence: XM\_008374531.3), MdPAL (NCBI Reference Sequence: XM\_008389362.3), Md4CL (NCBI Reference Sequence: XM\_029091143.1), MdANS (NCBI Reference Sequence: NM\_001328948.1), MdLAC3 (NCBI Reference Sequence: XM\_008386485.3), MdBGLU42 (NCBI Reference Sequence: XM\_008376601.3), MdC3H (NCBI Reference Sequence: XM\_008380681.3), MdCAD (NCBI Reference Sequence: NM\_001328793.1), MdCCR (NCBI Reference Sequence: XM\_008377320.3), MdCOMT (NCBI Reference Sequence: XM\_008368176.3). Error bars represent the SDs from three biological replicates. Lowercase letters represent significant differences at  $p < 0.05$  (Tukey's HSD test).
